# Supplementary material for: Cation effect on ionic liquid-involved polymer electrolytes for solid-state lithium metal batteries
Source: Royal Society of Chemistry journal article supplement (doi:10.1039/d1nj06210g), 2022-01-01
Supplement: d1nj06210g1.pdf [file d1nj06210g1.pdf]

## Supporting information

### **Cation effect on ionic liquid-involved polymer electrolyte for solid-state lithium metal batteries**

Xiujing Lin, Xinshuang Liu, Shiyuan Xu, Zeyu Liu, Cuie Zhao, Ruiqing Liu, Pan Li,  
Xiaomiao Feng<sup>\*</sup>, Yanwen Ma<sup>\*</sup>

---

<sup>\*</sup> Corresponding author. Tel.: +86 25 8586 6533; Tel: +86 25 8586 6396  
E-mail address: iamywma@njupt.edu.cn,

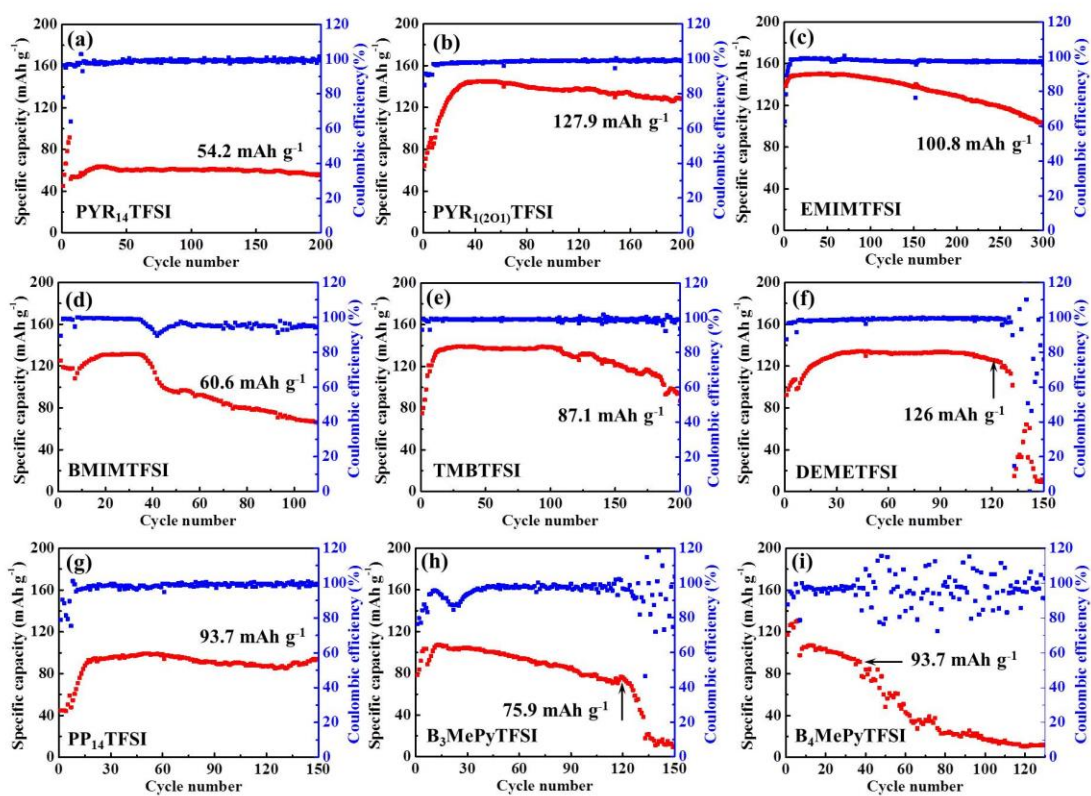

**Fig. S1.** The electrochemical performance of liquid Li/LFP batteries with ionic liquid-based electrolytes.

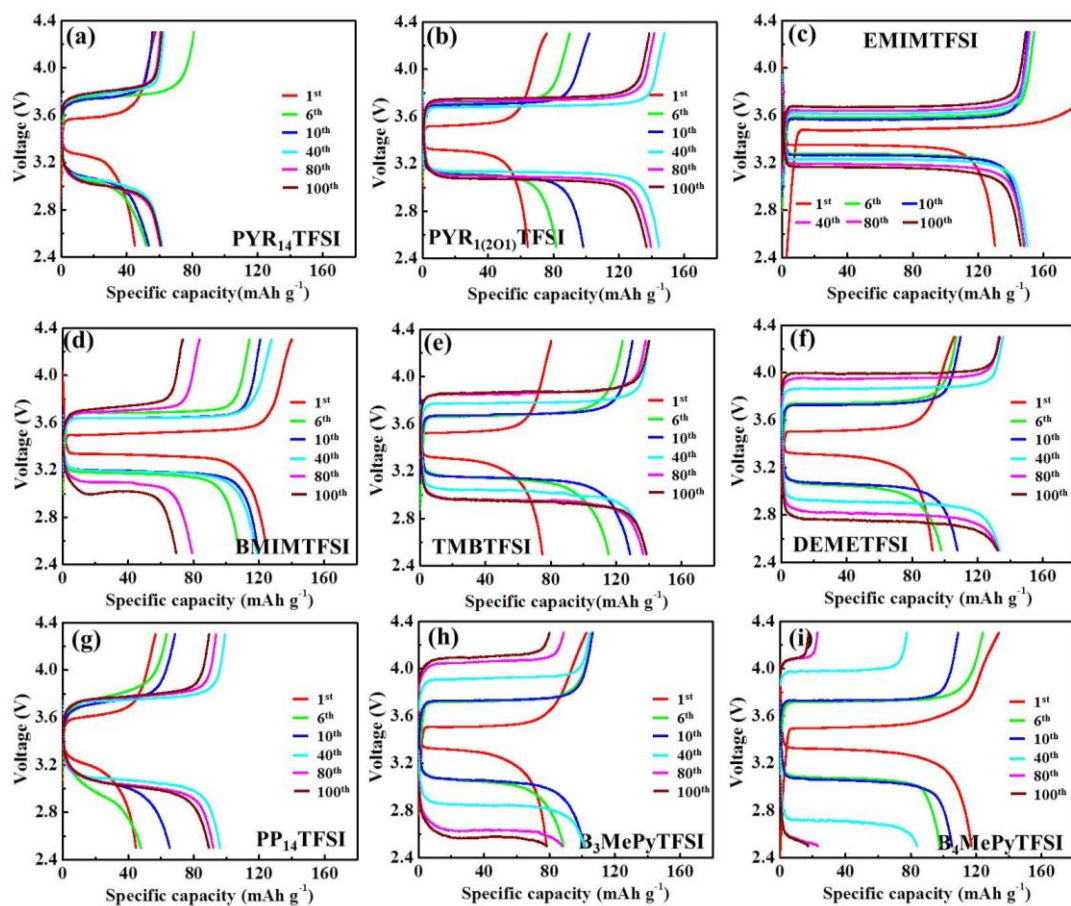

**Fig. S2.** The corresponding charge-discharge curves of liquid Li/LFP batteries with ionic liquid-based electrolytes.

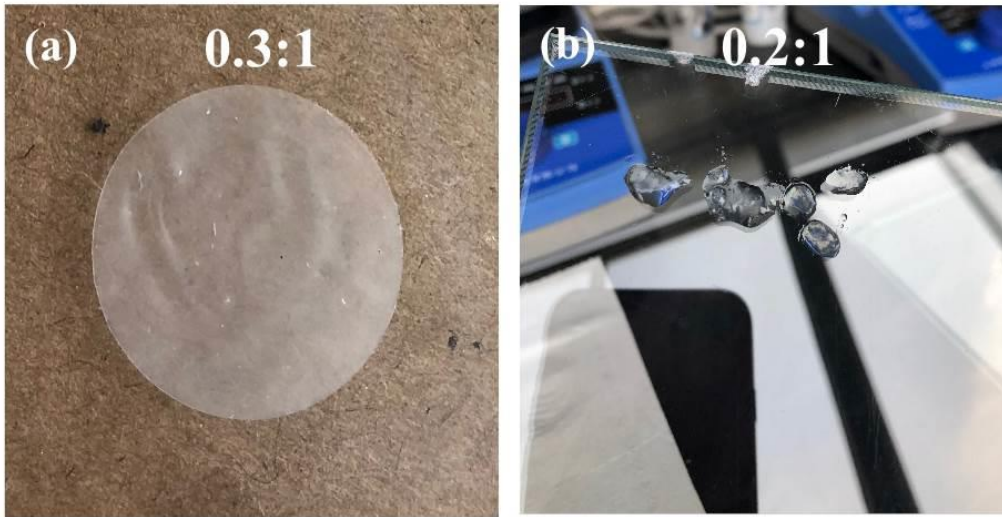

**Fig. S3.** The photos of PVDF/IL membranes in the weight ratio of (a) 0.3:1 and (b) 0.2:1.
